1 **Sex-specific age-related changes in glymphatic function assessed by resting-state functional**  
2 **magnetic resonance imaging**

3

4 Feng Han<sup>1</sup>, Xufu Liu<sup>1</sup>, Yifan Yang<sup>1</sup>, Xiao Liu<sup>1,2</sup> \*

5 **Affiliations:**

6 <sup>1</sup> Department of Biomedical Engineering, The Pennsylvania State University, PA, USA;

7 <sup>2</sup> Institute for Computational and Data Sciences, The Pennsylvania State University, PA, USA

8 \*Correspondence to: [xxl213@psu.edu](mailto:xxl213@psu.edu)

9

10

## 11 **Summary**

12

13 The glymphatic system that clears out brain wastes, such as amyloid- $\beta$  ( $A\beta$ ) and tau, through  
14 cerebrospinal fluid (CSF) flow may play an important role in aging and dementias. However, a  
15 lack of non-invasive tools to assess the glymphatic function in humans hindered the understanding  
16 of the glymphatic changes in healthy aging. The global infra-slow ( $<0.1$  Hz) brain activity  
17 measured by the global mean resting-state fMRI signal (gBOLD) was recently found to be coupled  
18 by large CSF movements. This coupling has been used to measure the glymphatic process and  
19 found to correlate with various pathologies of Alzheimer's disease (AD), including  $A\beta$  pathology.  
20 Using resting-state fMRI data from a large group of 719 healthy aging participants, we examined  
21 the sex-specific changes of the gBOLD-CSF coupling, as a measure of glymphatic function, over  
22 a wide age range between 36-100 years old. We found that this coupling index remains stable  
23 before around age 55 and then starts to decline afterward, particularly in females. Menopause may  
24 contribute to the accelerated decline in females.

25

## 26 **Keywords**

27 Healthy aging humans; glymphatic function; cerebrospinal fluid (CSF) flow; global brain  
28 activity; gender-effect; sleep quality; menopause.

29

## 30 **Introduction**

31

32 Aging is the leading risk factor for cognitive decline and neurodegenerative disorders that are often  
33 associated with excessive accumulation of misfolded proteins, including the amyloid- $\beta$  and tau, in  
34 the brain (Hou et al., 2019; Mawuenyega et al., 2010; Peng et al., 2016). Recent studies suggested  
35 the aggregation of toxic proteins could be partly attributed to impaired glymphatic clearance at  
36 advancing ages (Benveniste et al., 2019; Boland et al., 2018; Jessen et al., 2015). The glymphatic  
37 system, as “glia-lymphatic system”, constitutes a pathway for brain waste clearance in the central  
38 nervous system (Iliff et al., 2012; Jessen et al., 2015). In this clearance pathway, cerebrospinal  
39 fluid (CSF) moves from the periarterial space, facilitated by aquaporin-4 (AQP4) channels in  
40 astroglial endfeet, into the interstitial space to wash out interstitial solutes, including A $\beta$  and tau,  
41 into the perivenous space surrounding deep-draining veins (Jessen et al., 2015; Tarasoff-Conway  
42 et al., 2015). The paravascular CSF recirculation and interstitial solute efflux have been found to  
43 decrease in aged mice due to widespread loss of perivascular AQP4 polarization and reduced  
44 pulsatility of intracortical arterioles (Kress et al., 2014). In humans, the clearance along the  
45 glymphatic pathway and downstream meningeal lymphatic vessels, measured by contrast-agent  
46 MRI, decreased and delayed in older patients as compared with younger ones (Zhou et al., 2020).  
47 However, the invasive nature of these imaging tools has hindered a large-scale study of glymphatic  
48 function in healthy aging subjects. As a result, it remains unclear how the glymphatic function  
49 changes in aging, which is vital to understanding the mechanisms of age-related neurodegenerative  
50 disorders and cognitive decline.

51

52 Global infra-slow ( $< 0.1$  Hz) brain activity measured by resting-state fMRI (rsfMRI) was recently  
53 linked to the glymphatic function (Kiviniemi et al., 2016) and used to quantify its changes in  
54 Alzheimer's disease (AD) (Han et al., 2021b) and Parkinson's disease (PD) patients (Han et al.,  
55 2021a). Increasing evidence suggested the brain exhibits highly structured, brain-wide infra-slow  
56 ( $< 0.1$  Hz) activity during the resting state (Gu et al., 2021; Liu et al., 2021; Raut et al., 2021;  
57 Thompson et al., 2014). This global brain activity is evident in neural signals of distinct scales,  
58 ranging from single neuron recordings to whole-brain fMRI, and closely related to transient  
59 arousal modulations (Gu et al., 2021; Liu et al., 2021). The fMRI measure of this activity, i.e., the  
60 global mean rsfMRI blood-oxygenation-level-dependent (gBOLD) signal, is coupled by large CSF  
61 movements (Fultz et al., 2019) and astroglial calcium waves (Wang et al., 2018), suggesting its  
62 potential link to the glymphatic function. The gBOLD is greatly enhanced during sleep (Fukunaga  
63 et al., 2006; Larson-Prior et al., 2009; Olbrich et al., 2009), in accordance with the sleep-enhanced  
64 nature of the glymphatic function (Xie et al., 2013). In contrast, arterial and respiratory pulsations,  
65 which had been traditionally regarded as the main glymphatic drivers (Iliff et al., 2013; Yamada  
66 et al., 2013), actually lack of this attribute with the decreased amplitude during sleep (Boudreau et  
67 al., 2013; Douglas et al., 1982; Snyder et al., 1964). For all these reasons, the strength of gBOLD-  
68 CSF coupling has been proposed as a surrogate measure of the glymphatic function and found to  
69 correlate with various AD pathologies and cognitive decline in PD (Han et al., 2021b, 2021a).  
70 Recently, the disengagement of gBOLD from the default mode network (DMN) regions were  
71 found to account for early, preferential  $A\beta$  accumulation in these higher-order brain areas in the  
72 early stage of  $A\beta$  pathology (Han et al., 2022). In these early studies, the gBOLD-CSF coupling  
73 also was found to correlate significantly with age and sex (Han et al., 2021b, 2021a), but the related  
74 findings were limited by narrow age ranges and complicated by the inclusion of patient data.

75

76 The fMRI-based glymphatic measurement, together with the widely available rsfMRI data,  
77 provides us a unique opportunity to study the change of the glymphatic function over a wider age  
78 range and in a larger population of healthy aging subjects. In this study, we used rsfMRI data of  
79 719 healthy aging subjects in the Human Connectome Project Aging (HCP-A) (Harms et al., 2018)  
80 to study the age-related changes in glymphatic function in a sex-specific way. We found that the  
81 fMRI-based glymphatic measure remained relatively stable within the range of age 36-54 and then  
82 started to decrease around age mid-50s. Compared with males, females showed a larger and more  
83 abrupt decline of the glymphatic function at this transitioning point. In addition, menopause may  
84 lead to an accelerated glymphatic decline in females.

85

## 86 **Results**

87

### 88 **Nonlinear age trajectory of the gBOLD-CSF coupling**

89

90 We used rsfMRI data of 719 healthy subjects (403 females) from the HCP-A project with age  
91 ranging from 36 to 100. Following previous procedures (Fultz et al., 2019; Han et al., 2021b,  
92 2021a), we obtained the whole-brain gBOLD signal from the gray matter regions and the bottom-  
93 slice CSF signal around the bottom of the cerebellum to measure CSF movements via MR inflow  
94 effects (Fultz et al., 2019; Gao et al., 1996; Gao and Liu, 2012) (**Fig. S1A and S1B**). Consistent  
95 with the previous studies, the averaged cross-correlation function of the two signals displayed a  
96 biphasic pattern with a negative peak ( $r = -0.33$ ) at the +3.2 sec lag (**Fig. S1C**). The gBOLD-CSF  
97 correlation at this +3.2 sec time lag was then computed for individual subjects to quantify their

98 coupling and thus the glymphatic function. The gBOLD-CSF coupling was then averaged within  
99 10 equal-size groups of subjects at different ages, and the resulting age-related trend displayed a  
100 clear non-linear trajectory: it remains relatively stable between ages 36 to 54 and then begins to  
101 decline at around 55 years old (i.e., yrs) (**Fig. 1A**). We then divided the entire cohort into younger  
102 and older groups according to the age boundary (53.9 yrs) between the fourth and fifth groups,  
103 which had the largest drop among pairs of consecutive groups. The gBOLD-CSF coupling is not  
104 correlated ( $r = -3.7 \times 10^{-3}$ ,  $p = 0.95$ ) with age in the younger group whereas this correlation is  
105 significant ( $r = 0.14$ ,  $p = 3.9 \times 10^{-3}$ ) in the older group (**Fig. 1B**).

106  
107 We examined potential factors mediating this age-coupling association. Neither the coupling index  
108 nor age was significantly correlated with the total Pittsburgh Sleep Quality Index (PSQI) score,  
109 but they were similarly correlated with a few PSQI items, including sleep medication, trouble  
110 sleeping, and sleep hours. Nevertheless, the age-related changes in the gBOLD-CSF coupling  
111 remain largely unchanged with adjusting for these sleep-related measurements (**Fig. 2**). Likewise,  
112 the age trajectory of the gBOLD-CSF remained similar with controlling for other non-sleep factors,  
113 including the head motion assessed by mean framewise displacement (FD) (**Fig. S2**), the brain  
114 volume (**Fig. S3**), and the CSF volume (mainly from the ventricles) (**Fig. S4**), even though these  
115 factors showed a significant dependence on age (all  $p < 3.9 \times 10^{-7}$  for linear regression).

116

### 117 **Sex-specific differences in age-related changes**

118

119 The gBOLD-CSF coupling is different between females and males. The mean gBOLD-CSF  
120 strength is significantly ( $p = 7.9 \times 10^{-6}$ , two-sample t-test) weaker in females than males (**Fig. 3A**),

121 consistent with the previous finding in an AD cohort (Han et al., 2021b). The age trajectories of  
122 the coupling index are different for the two groups. The gBOLD–CSF coupling decreases more  
123 evidently and abruptly with aging in the females, particularly around 55 yrs, whereas the males  
124 showed a more gradual and steady age-related changes (**Fig. 3B**).

125  
126 We further tested whether and how the gBOLD-CSF coupling is affected by menopause, which  
127 often occurs before age 55. This analysis was focused on the age range of 36-55, which includes  
128 both post-menopause and other females. The menopause status had no significant effects on the  
129 gBOLD-CSF coupling strength for two subgroups of subjects of similar ages (both  $p > 0.13$ ; two  
130 sample t-test). However, it showed a marginally significant ( $p = 0.061$ ) interaction with age on the  
131 coupling strength. Consistent with this result, the gBOLD-CSF coupling in the postmenopausal  
132 females appeared to decline earlier in the age mid-40s (**Fig. 3C**), making the drop around age 55  
133 less abrupt and significant ( $p = 0.058$ ). The result suggests the potential effect of the menopause  
134 to accelerate the decline of the fMRI-based glymphatic measure.

135

## 136 **Discussion**

137

138 Here we study the sex-specific age-related change in the glymphatic function in a large healthy  
139 aging population based on the gBOLD-CSF coupling measured by rsfMRI. We showed that the  
140 gBOLD-CSF coupling changes with age in a non-linear way: it remains relatively stable from 36  
141 yrs to 54 yrs and then begins to decrease afterwards. Importantly, the decrease at age mid-50s is  
142 larger and more abrupt in females than in males.

143

144 Converging evidence has suggested a link between the glymphatic function and the resting-state  
145 global brain activity, often measured by the gBOLD signal of rsfMRI. The gBOLD, once regarded  
146 as noise, measured a brain-wide, low-frequency ( $< 0.1$  Hz) activity linked to transient arousal  
147 modulations, which also has been observed in monkey electrocorticography (ECoG) (Liu et al.,  
148 2015, 2018) and mice spiking data as highly structured patterns (Liu et al., 2021). The low-  
149 frequency rsfMRI signals were first linked to the glymphatic function due to their potential link to  
150 CSF dynamics and vasomotor waves (Kiviniemi et al., 2016). It was found later that it is the global  
151 component of rsfMRI, i.e., gBOLD, that is coupled to CSF movements in a sleep-dependent way  
152 (Fukunaga et al., 2006; Fultz et al., 2019; Helakari et al., 2022; Larson-Prior et al., 2009; Olbrich  
153 et al., 2009). The sleep dependency makes it more suitable for driving the sleep-dependent  
154 glymphatic clearance (Holth et al., 2019; Xie et al., 2013), as compared with the cardiac and  
155 respiratory pulsations that are actually suppressed during sleep (Baust and Bohnert, 1969;  
156 Boudreau et al., 2013; Douglas et al., 1982; Guazzi and Zanchetti, 1965; Snyder et al., 1964).  
157 Nevertheless, the gBOLD is not independent from these physiological drivers but shows strong  
158 correlations with the low-frequency modulation of cardiac and respiratory functions (Birn et al.,  
159 2006; Chang et al., 2009; Gu et al., 2020; Özbay et al., 2019, 2018; Power et al., 2018). Consistent  
160 with these human findings of strong low-frequency physiological modulation, a recent mice study  
161 demonstrated very strong arterial constrictions/dilations during sleep in the same frequency range  
162 ( $<0.1$  Hz) (Turner et al., 2020). Such low-frequency vessel modulations were coupled by pupil  
163 size changes suggestive of transient arousal modulations (Turner et al., 2022), similar to the global  
164 brain activity measured by gBOLD (Liu et al., 2021, 2018; Pais-Roldán et al., 2020; Turchi et al.,  
165 2018). Animal research also suggested that the gBOLD is coupled by large calcium signals of  
166 astrocytes (Pais-Roldán et al., 2020), and the AQP4 channels on the endfeet of these cells are a



167 key player of the glymphatic system (Iliff et al., 2012; Jessen et al., 2015). To date, the key  
168 evidence linking the gBOLD to the glymphatic function came from a human study showing that  
169 the gBOLD is coupled to large CSF movements (Fultz et al., 2019). Based on this, the gBOLD-  
170 CSF coupling was used to quantify glymphatic function and found correlated with various  
171 pathologies of AD and cognitive decline in PD (Han et al., 2021b, 2021a). The preferential  
172 reduction of gBOLD signal in the higher-order default mode network was found to account for  
173 early, preferential  $\beta$ -amyloid accumulations in the same regions at the early stage of AD (Han et  
174 al., 2022). All these findings established the foundation for using the gBOLD-CSF coupling to  
175 measure the glymphatic function. But a direct proof of their relationship would need future  
176 experiments capable of recording brain signals across distinct spatial and temporal scales. It is also  
177 worth noting that the debate is ongoing regarding specific components of glymphatic theory, e.g.,  
178 the convective flow in the interstitial space and the involvement of AQP4 channels in the process  
179 (Abbott et al., 2018; Hladky and Barrand, 2022). Nevertheless, a consensus view is reached  
180 regarding the existence of periarterial CSF flow (Mestre et al., 2018) and its role in waste clearance  
181 (van Veluw et al., 2020), which is more related to the gBOLD-CSF coupling in the present study.  
182  
183 Brain aging affects the glymphatic function. The CSF inflow of larger tracers or macromolecules  
184 decreased up to 85% in old wild-type mice as compared to young counterpart (Da Mesquita et al.,  
185 2018; Nedergaard and Goldman, 2020). The decreased glymphatic flow in aged mice has been  
186 partly attributed to dysregulation of astroglial water transport due to the widespread loss of AQP4  
187 polarization (Kress et al., 2014), the decline of CSF pressure (Fleischman et al., 2012), and the  
188 changes of CSF secretion and protein content (Chen et al., 2009). Arterial wall stiffening and  
189 associated reduction of arterial pulsatility (Zieman et al., 2005) may also account for age-related

190 glymphatic reduction (Iliff et al., 2013). Human studies of glymphatic function remain sparse (Eide  
191 et al., 2018; Zhou et al., 2020). Previous studies using the gBOLD-CSF coupling found a consistent  
192 association between the age and glymphatic function, but only in patients of relatively old ages  
193 (Han et al., 2021a, 2021b). A retrospective study combined contrast-agent MRI data from various  
194 patient groups to study the glymphatic function and its change with age (Zhou et al., 2020). Despite  
195 different methodologies and patient cohorts from the present study, a similar age trajectory was  
196 observed for the glymphatic function: it remains stable before 50 yrs and then begins to decline  
197 since then (Zhou et al., 2020). The age-related glymphatic changes could be critical for the aging-  
198 related risk for neurodegenerative diseases (Hou et al., 2019). The glymphatic dysfunction may  
199 result in inadequate clearance and thus accumulation of toxic proteins, such as A $\beta$  and tau, and  
200 thereby increase the vulnerability to developing cognitive impairments and neurodegenerative  
201 diseases (Jessen et al., 2015; Tarasoff-Conway et al., 2015). Epidemiologic research suggested the  
202 late-onset AD, the most common AD variant, starts around the mid-60s with the prevalence  
203 doubled every 5 years afterwards (Qiu et al., 2009). But the pathophysiological process, including  
204 the accumulation of aggregated A $\beta$ , could begin more than a decade before the dementia (Jack et  
205 al., 2013; Sperling et al., 2014). Together, these findings suggested a timeline consistent with our  
206 finding that the glymphatic function begins to decrease at age mid-50s.

207

208 The female sex is another leading risk factor for developing AD (Mielke et al., 2014). It has been  
209 found a significantly weaker glymphatic function, as measured by gBOLD-CSF coupling strength,  
210 in females than in males (Han et al., 2021b). Here we confirmed the finding with a much larger  
211 dataset from healthy populations. Importantly, we further showed that the glymphatic function had  
212 different age trajectories in the two groups with the females displaying a larger and more abrupt

213 decline at around 55 yrs. In fact, women indeed show larger and faster cognitive declines than men  
214 with aging (Levine et al., 2021; Nooyens et al., 2022). Together with increasing evidence that links  
215 the glymphatic dysfunction and cognitive impairments (Da Mesquita et al., 2018; Iliff et al., 2014;  
216 Zou et al., 2019), the sex-specific glymphatic change with aging may provide a possible  
217 explanation for the sex differences in age-related cognitive decline. The menopause and associated  
218 hormone loss have been suggested to contribute to cognitive decline in females (Brown and  
219 Gervais, 2020; Hachul et al., 2015). Our result is not inconsistent with this notion by showing a  
220 marginally significant ( $p = 0.061$ ) interaction between age and menopause on the coupling metrics.  
221 Among the females of age 36-55, the post-menopausal group appeared to show a decline of  
222 gBOLD-CSF coupling with age, which is absent in the non-menopause group. A limited sample  
223 size and information related to menopause could partially account for statistical non-significance.  
224 But the finding should warrant future studies looking into the menopause effects on the glymphatic  
225 function with a refined design and/or augmented dataset.

226  
227 Sleep quality appeared not to be a major contributor to the age-related glymphatic changes. The  
228 gBOLD-CSF coupling and age are similarly correlated with a few sleep measures, including the  
229 frequency of using sleep medication and the sleep troubles in the month prior to the experiments.  
230 However, the age-related changes in the gBOLD-CSF coupling remained largely unchanged after  
231 adjusting for these sleep measures. Nevertheless, the change in sleep architecture might be related  
232 to the sex difference seen in the age-related glymphatic changes. The age and sex are known to  
233 have a strong interaction effect on the composition of sleep stages. Aging in males is associated  
234 with a significant increase of light sleep (stages 1&2) but decrease in slow wave sleep (SWS: sleep  
235 stages 3&4), whereas this age-related change is absent in women (Mander et al., 2017; Redline et

236 al., 2004). It is known that the glymphatic function increases during sleep and anesthesia featuring  
237 strong slow wave activity (SWA) (Hablitz et al., 2019; Ju et al., 2017; Xie et al., 2013), and one  
238 would thus expect an improved glymphatic clearance with a higher percentage of SWS. The  
239 empirical evidence, however, suggested an opposite by showing higher SWS is associated with  
240 lower CSF A $\beta$ 42 level (Varga et al., 2016), which is an early indicator of preclinical AD and often  
241 accompanied by cortical A $\beta$  accumulation (Jack et al., 2013; Palmqvist et al., 2017). The paradox  
242 might be explained by an observation about the gBOLD and its coupling with CSF flow. They  
243 were more specifically related to ultra-slow (0.6-1 Hz) component of SWA (often related to K-  
244 complexes) (Özbay et al., 2019) and phasic changes of SWA power (Fultz et al., 2019; Gu et al.,  
245 2022), which could be stronger during the light sleep than SWS. Indeed, the SWA was found to  
246 decrease in subjects with more cortical A $\beta$  and poorer memory consolidation (Mander et al., 2015;  
247 Winer et al., 2020), as well as AD patients (De Gennaro et al., 2017), but the reduction was specific  
248 to its ultra-slow component (0.6-1 Hz) with the delta-band (1-4 Hz) power showing opposite  
249 changes. Based on all these findings, it is possible that the age-related increase in the percentage  
250 of light sleep in males may help to offset some age-related decline in glymphatic function and thus  
251 lead to its slow deterioration as compared with females. However, the test of this hypothesis would  
252 have to be left for future studies, particularly those with assessment of subjects' sleep architecture.

253

## 254 **STAR Methods**

255

### 256 **Participants and study data**

257 This study included 719 healthy human subjects (36~100 yrs; 403 females) who have participated  
258 in all 4 sessions of rsfMRI scanning in the HCP-A project

259 (<https://www.humanconnectome.org/study/hcp-lifespan-aging>). For these subjects, we also used  
260 their T1-weighted structural MRI imaging and demographic data, such as the age, sex, and the  
261 menstrual cycle of females. These “typical aging” subjects were healthy for their age without  
262 identified pathological causes of cognitive declines, such as stroke or clinical dementia  
263 (Bookheimer et al., 2019). All participants provided written informed consent, and investigators  
264 at each HCP-A participating site obtained ethical approval from the corresponding institutional  
265 review board (IRB).

266  
267 The use of de-identified data from the HCP-A and the sharing of analysis results have been  
268 reviewed and approved by the Pennsylvania State University IRB (IRB#: STUDY00008766) and  
269 also strictly followed the National Institute of Mental Health (NIMH) Data Archive-data use  
270 certification (DUC).

271

272

### 273 **Image acquisition and preprocessing**

274 The rsfMRI data were acquired at 3T MR scanners (Siemens Medical Solutions; Siemens,  
275 Erlangen, Germany) with a matched protocol (Harms et al., 2018) across four acquisition sites  
276 including Washington University St. Louis, University of Minnesota, Massachusetts General  
277 Hospital, and University of California, Los Angeles (researchers in Oxford University dedicating  
278 to the data analysis). For each subject, 4 sessions of rsfMRI (including the anterior to posterior  
279 phase encoding (PE) from Day1, i.e., AP1, as well as PA1, AP2, and PA2) were followed by one  
280 T1-weighted structural MRI session (MPRAGE sequence, echo time (TE)= 1.8/3.6/5.4/7.2 ms  
281 [multi-echo], repetition time (TR) = 2,500 ms, field of view (FOV) = 256 × 256 mm<sup>2</sup>, 320 × 300

282 matrix, number of slices = 208, voxel size =  $0.8 \times 0.8 \times 0.8 \text{ mm}^3$ , flip angle =  $8^\circ$ ) (Harms et al.,  
283 2018). The T1-weighted MRI served to provide the whole brain and CSF volume information and  
284 was used for the anatomical segmentation and registration. For rsfMRI acquisition, 488 fMRI  
285 volumes were collected with a multiband gradient-recalled (GRE) echo-planar image (EPI)  
286 sequence (TR/TE=800/37 ms, flip angle= $52^\circ$ , FOV = 208 mm,  $104 \times 90$  matrices, 72 oblique axial  
287 slices, 2 mm isotropic voxels, multiband acceleration factor of 8).

288

289 We referred to the previous study (Han et al., 2021b) in preprocessing the rsfMRI data using the  
290 FSL (version 5.0.9; <https://fsl.fmrib.ox.ac.uk/fsl/fslwiki/FSL>) (Smith et al., 2004) and AFNI  
291 (version 16.3.05; <https://afni.nimh.nih.gov/>) (Cox, 1996). The general fMRI preprocessing  
292 procedures included motion correction, skull stripping, spatial smoothing (full width at half  
293 maximum (FWHM) = 4mm), temporal filtering (bandpass, approximately 0.01 to 0.1 Hz), and the  
294 co-registration of each fMRI volume to corresponding T1-weighted structural MRI and then to the  
295 152-brain Montreal Neurological Institute (MNI-152) space. The motion parameters were not  
296 regressed out to avoid attenuating the gBOLD signal (Gu et al., 2020; Han et al., 2021b). The  
297 preprocessing of structural images was performed using FSL. Processing steps included spatial  
298 normalization and skull stripping.

299

### 300 **Extract gBOLD and the CSF inflow signals and compute their coupling**

301

302 We followed the previous studies (Han et al., 2021b, 2021a) to extract the gBOLD signal and CSF  
303 inflow signal. We defined the mask of the gray matter regions based on the Harvard-Oxford  
304 cortical and subcortical structural atlases (<https://neurovault.org/collections/262/>). We then

305 transformed the gray-matter mask from the MNI-152 space back to the original space of each  
306 session to avoid spatial blurring from the registration process (Fultz et al., 2019), and spatially  
307 averaged the Z-normalized gray-matter rsfMRI signals to obtain the gBOLD signal. Following the  
308 previous study (Han et al., 2021b), the CSF inflow signal was extracted from the CSF region at  
309 the bottom edge of fMRI, with a similar voxel number of CSF ROI for all subjects/sessions (see  
310 an example in **Fig. S1A**). We extracted the CSF ROI from the preprocessed fMRI signal at the  
311 original individual space referring to the corresponding CSF region below the bottom of the  
312 cerebellum from the high-resolution T1-weighted MRI (see an exemplary time-series of gBOLD  
313 and bottom CSF fMRI in **Fig. S1B**).

314

315 The cross-correlation function was calculated on the extracted gBOLD signal and the CSF inflow  
316 signal for each fMRI session from each individual subject. The cross-correlation function  
317 quantified the Pearson's correlation at different time lags. We first averaged all the cross-  
318 correlation functions from the 4 individual fMRI sessions (AP1, PA1, AP2, and PA2) for each  
319 subject, and further averaged the functions across all subjects (**Fig. S1C**). Referring to the previous  
320 studies (Han et al., 2021b, 2021a), we quantified the gBOLD–CSF coupling with the session-mean  
321 cross-correlation at the lag of +3.2 seconds, where the negative peak of the subject-mean cross-  
322 correlation located, for each subject.

323

### 324 **The relationship between the gBOLD–CSF coupling and age**

325

326 To access the association between the gBOLD–CSF coupling and age, we first divided all the  
327 subjects into 10 sub-groups with different ages (based on the deciles), and further calculated and

328 compared the mean gBOLD–CSF coupling for each sub-group. Moreover, all the subjects were  
329 separated into the younger (age < 53.9 yrs) and older (age ≥ 53.9 yrs) groups. The linear regression  
330 was used to evaluate the association between the ages and the coupling measures for the subjects  
331 in each sub-group.

332

333 Several sensitivity analyses were then performed to test whether the age-coupling association  
334 would be driven by the various sleep quality measures (i.e., PSQI measures), the brain volume, as  
335 well as the CSF volume. We included the total PSQI score, as well as 4 different PSQI items,  
336 which were selected due to their strong dependence ( $p < 0.05$  for linear regression or ordinal  
337 regression) with the coupling measures or age, covering the components/aspects of sleep  
338 medication, trouble sleeping, and sleep hours in the sensitivity test. In the test, each of these PSQI  
339 measures was first linked to the coupling measures and age, and then regressed out from the  
340 coupling measures to further examine the age-coupling associations studied in **Fig. 1**. Similar age-  
341 coupling association tests were applied on the whole brain volume and CSF volume, respectively.  
342 The whole brain volume was accessed by the volume number of all brain regions excluding the  
343 CSF area from the T1-weight MRI, where the CSF regions mainly from all the ventricles were  
344 extracted to quantify the CSF volume. To test whether the head motion would drive the age-  
345 coupling association, we adjusted the gBOLD-CSF coupling for the head motion from each  
346 rsfMRI acquisition, which was quantified by the session-mean framewise displacement (FD),  
347 following the previous study (Han et al., 2021b) and replicated the analysis in **Fig. 1**. The FD was  
348 calculated as the sum of the absolute value of all 6 translational and rotational realignment  
349 parameters derived from the preprocessing (Power et al., 2012). We did not use motion-censoring



350 methods (Power et al., 2014, 2012) to avoid the influence from the cross-correlation of the  
351 concatenated timeseries of gBOLD and CSF fMRI signals.

352

### 353 **Sex-specific coupling changes with aging**

354

355 We further compared the gBOLD–CSF coupling strength between the male and female subjects,  
356 as well as the respective trajectory of coupling changing with aging. First, we compared the  
357 coupling measures between sexes with a two-sample t-test. Second, we divided the males or  
358 females into 7 sub-groups (one group per 10 years; starting from 36~45 yrs, i.e.,  $36 \leq \text{age} < 46$ ),  
359 respectively, and compared the coupling measures across these sub-groups.

360

361 To examine whether the menopause would affect the tendency of the coupling measure changing  
362 with aging, we separated all the females into the “post-menopause” and “other females” groups  
363 (based on the measure of “whether having no period for 12 months” in the “menstrual cycle” data),  
364 divided the “other females” into two stages of the “36~45 yrs” and “46~55 yrs”, and compared the  
365 coupling measures between the two stages. Similarly, we also selected the same age range/sub-  
366 groups for the post-menopausal subjects and contrasted the corresponding coupling measures  
367 between the two sub-groups, as well as compared the coupling across the “post-menopause” and  
368 “other females” subjects for each age-stage. Furthermore, we applied the same grouping metric on  
369 the “post-menopause” subjects as the entire group of females above, i.e., 7 groups with an age  
370 duration of 10 years (from 36~45 yrs), and then replicated the analyses for whole females to  
371 observe the trajectory of the coupling changing with aging.

372

373 **Statistical analysis**

374

375 The present study used the two-sample t-test for the group comparison of continuous variables,  
376 including the coupling difference of neighboring groups and that between males and females. The  
377 linear regression was applied to estimate the association between age and gBOLD–CSF coupling  
378 for the younger group and older group, respectively. The ordinal regression was used for responses  
379 with natural ordering among categories (i.e., the association between the coupling measure or age  
380 and these PSQI measures). The cross-correlation function was used to evaluate the relationship  
381 between the gBOLD signal and CSF inflow signal at different time lags. We also tested the  
382 interaction effects of age and menopause on the coupling measure. In the study, Pearson’s  
383 correlation was employed to assess the inter-subject associations between different variables. A  
384 p-value less than 0.05 was considered statistical significance.

385

386 **Acknowledgements**

387

388 The HCP-A dataset reported in this study was supported by grants U01AG052564 and  
389 U01AG052564-S1 and by the 14 NIH Institutes and Centers that support the NIH Blueprint for  
390 Neuroscience Research, by the McDonnell Center for Systems Neuroscience at Washington  
391 University, by the Office of the Provost at Washington University, and by the University of  
392 Minnesota Medical School. We gratefully acknowledge the efforts of all the individuals who have  
393 contributed to the project.

394

395 Data and/or research tools used in the preparation of this manuscript were obtained from the  
396 National Institute of Mental Health (NIMH) Data Archive (NDA). NDA is a collaborative  
397 informatics system created by the National Institutes of Health to provide a national resource to  
398 support and accelerate research in mental health. Dataset identifier(s): 10.15154/1528735. This  
399 manuscript reflects the views of the authors and may not reflect the opinions or views of the NIH  
400 or of the Submitters submitting original data to NDA.

401

402 **Funding:**

403

404 This work is supported by funding from the following:

405 National Institutes of Health grant RF1 MH123247-01 (Xiao Liu);

406 National Institutes of Health grant R01 NS113889 (Xiao Liu).

407

408 **Author contributions:**

409

410 Conceptualization: Feng Han, Xiao Liu

411 Methodology: Feng Han, Xiao Liu

412 Investigation: Feng Han, Xufu Liu, Yifan Yang, Xiao Liu

413 Visualization: Feng Han, Yifan Yang, Xiao Liu

414 Funding acquisition: Xiao Liu

415 Project administration: Xiao Liu

416 Supervision: Xiao Liu

417 Writing – original draft: Feng Han, Xiao Liu

418 Writing – review & editing: Feng Han, Xufu Liu, Yifan Yang, Xiao Liu

419

420 **Competing Interests:**

421

422 The authors report no financial interests or potential conflicts of interest.

423

424 **Data and Materials Availability:**

425

426 The multimodal data, including subject characteristics, structural MRI, and rsfMRI are all publicly  
427 available at the NDA website upon the approval of the data use application  
428 (<https://nda.nih.gov/get/access-data.html>). All the code used in the present study are available from  
429 the corresponding author upon request.

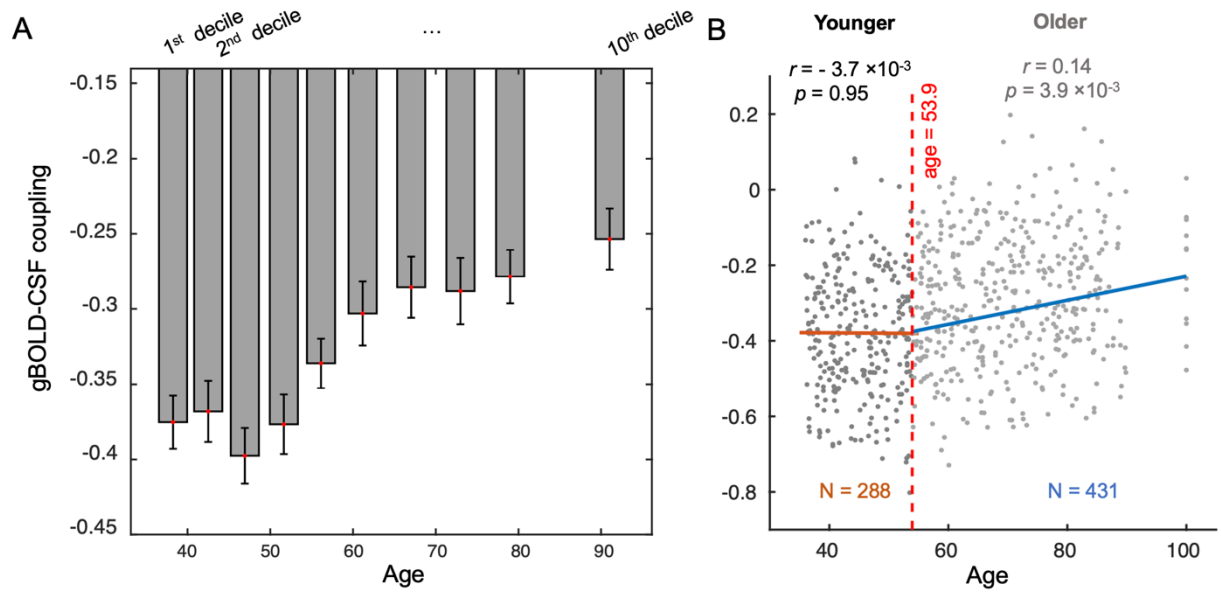

430

431 **Fig. 1 The change of gBOLD–CSF coupling with age.** (A) The gBOLD–CSF coupling remains  
432 relatively stable before age mid-50s and then begins to decrease since then. The entire cohort was  
433 grouped into 10 subgroups of equal size. Each error bar represents one standard error of the mean.  
434 (B) The gBOLD-CSF coupling was significantly correlated with age for the group of subjects over  
435 53.9 yrs ( $r = 0.14$ ,  $p = 3.9 \times 10^{-3}$ ; gray dots at the right), but not so ( $r = -3.7 \times 10^{-3}$ ,  $p = 0.95$ ; black  
436 dots at the left) for the younger group. Each dot represents one subject.

437

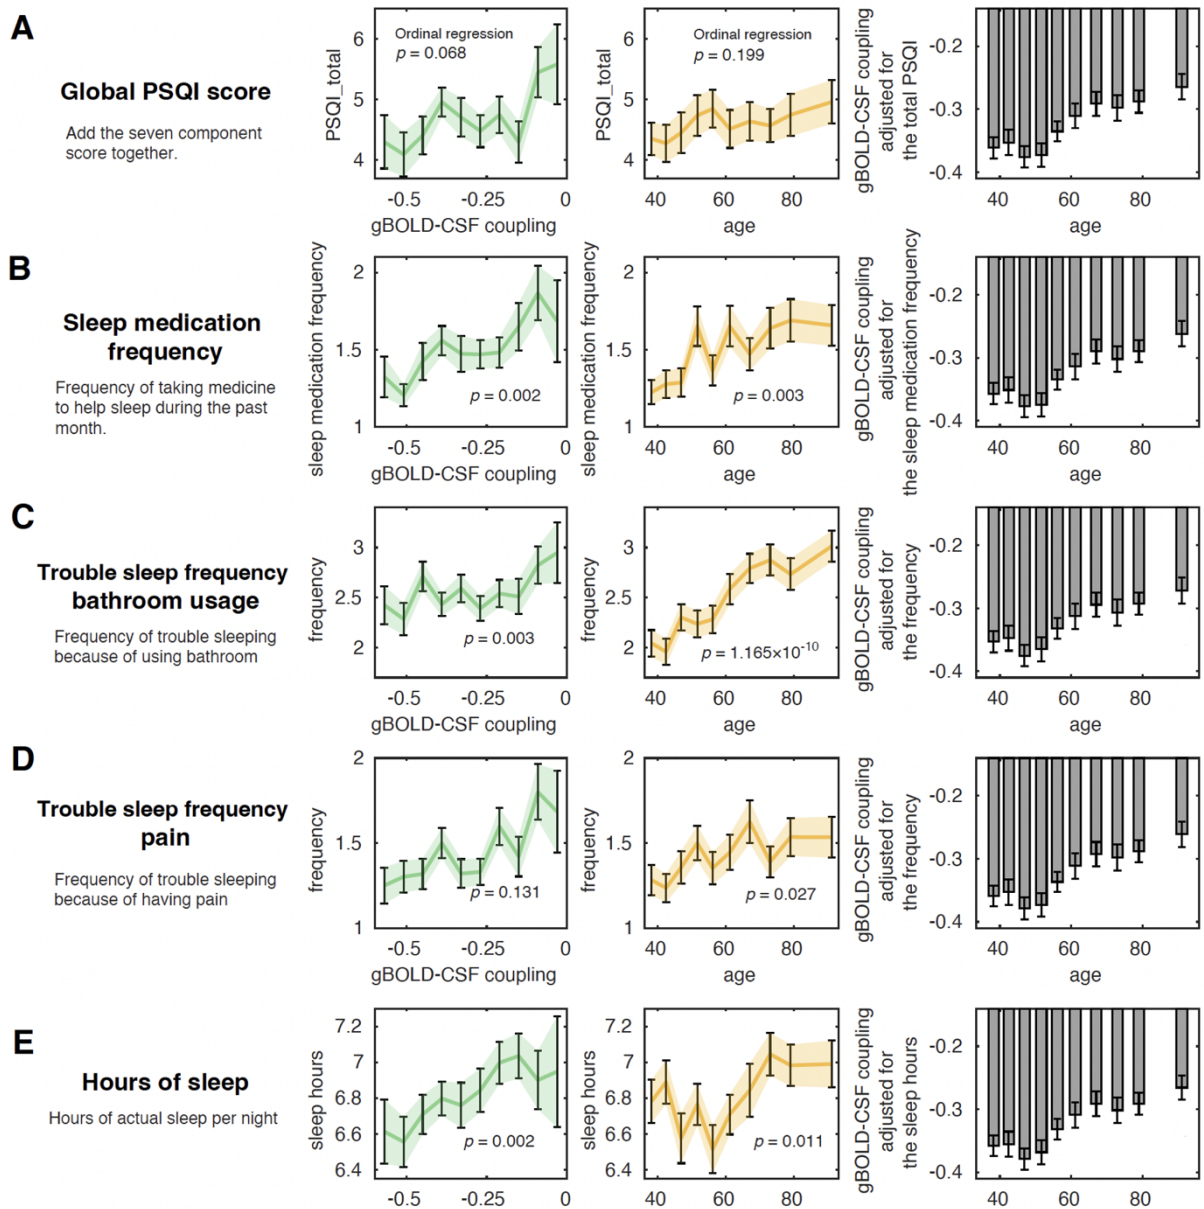

438

439 **Fig. 2 The age-related changes in gBOLD-CSF coupling remain similar with controlling for**

440 **sleep measures.** The gBOLD-CSF coupling (left) and age (middle) are similarly correlated with

441 a few sleep-related measurements in PSQI, including the sleep medication frequency (2<sup>nd</sup> row),

442 the frequency of bathroom-use during sleep-time (3<sup>rd</sup> row), the frequency of having pain during

443 sleep-time (4<sup>th</sup> row), and sleep hours (5<sup>th</sup> row), but not the total PSQI score (1<sup>st</sup> row). However, the

444 age-related changes in gBOLD-CSF coupling remain similar with adjusting for these PSQI  
445 measures (right). Each dot represents one subject, and error bars represent the standard error of the  
446 mean.  
447

448

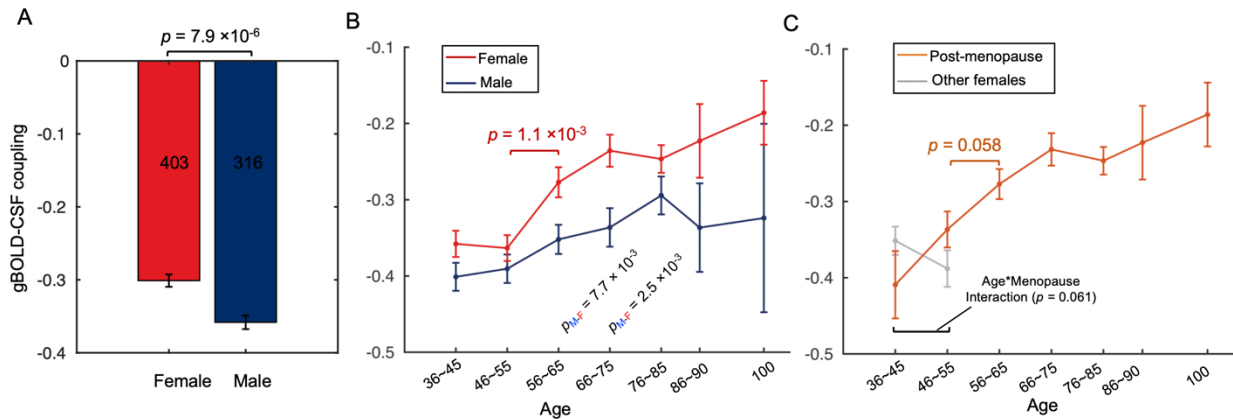

449

450 **Fig. 3 The age-coupling association showed distinct patterns between males and females. (A)**

451 The gBOLD-CSF coupling is significantly weaker in females (red) than in males (blue) ( $p =$

452  $7.9 \times 10^{-6}$ , two-sample t-test). (B) The age-related changes of the gBOLD-CSF coupling were

453 summarized separately for the females and males and showed different patterns of trajectory:

454 gBOLD-CSF coupling in the females showed a steep decline around 55 yrs ( $p = 1.1 \times 10^{-3}$  for two

455 consecutive subgroups around that age), in contrast to the slow and gradual decreases in the males.

456 (C) The gBOLD-CSF coupling trends in the “Post-menopause” and “Other females” groups. All

457 females above age 55 are post-menopause. Within the age range of 36-55, the menopause status

458 and age showed a marginally significant ( $p = 0.061$ ) interaction effect on the gBOLD-CSF

459 coupling. The coupling index started to decrease early at age mid-40s and thus its reduction around

460 age mid-50s is less significant ( $p = 0.058$ ) as compared with the entire female group.

461



462 **References**

- 463 Abbott, N.J., Pizzo, M.E., Preston, J.E., Janigro, D., Thorne, R.G., 2018. The role of brain  
464 barriers in fluid movement in the CNS: is there a ‘glymphatic’ system? *Acta Neuropathol.*  
465 135, 387–407. <https://doi.org/10.1007/s00401-018-1812-4>
- 466 Baust, W., Bohnert, B., 1969. The regulation of heart rate during sleep. *Exp. Brain Res.*  
467 <https://doi.org/10.1007/BF00235442>
- 468 Benveniste, H., Liu, X., Koundal, S., Sanggaard, S., Lee, H., Wardlaw, J., 2019. The Glymphatic  
469 System and Waste Clearance with Brain Aging: A Review. *Gerontology* 65, 106–119.  
470 <https://doi.org/10.1159/000490349>
- 471 Birn, R.M., Diamond, J.B., Smith, M.A., Bandettini, P.A., 2006. Separating respiratory-  
472 variation-related fluctuations from neuronal-activity-related fluctuations in fMRI.  
473 *Neuroimage*. <https://doi.org/10.1016/j.neuroimage.2006.02.048>
- 474 Boland, B., Yu, W.H., Corti, O., Mollereau, B., Henriques, A., Bezard, E., Pastores, G.M.,  
475 Rubinsztein, D.C., Nixon, R.A., Duchen, M.R., Mallucci, G.R., Kroemer, G., Levine, B.,  
476 Eskelinen, E.-L., Mochel, F., Spedding, M., Louis, C., Martin, O.R., Millan, M.J., 2018.  
477 Promoting the clearance of neurotoxic proteins in neurodegenerative disorders of ageing.  
478 *Nat. Rev. Drug Discov.* 17, 660–688. <https://doi.org/10.1038/nrd.2018.109>
- 479 Bookheimer, S.Y., Salat, D.H., Terpstra, M., Ances, B.M., Barch, D.M., Buckner, R.L., Burgess,  
480 G.C., Curtiss, S.W., Diaz-Santos, M., Elam, J.S., Fischl, B., Greve, D.N., Hagy, H.A.,  
481 Harms, M.P., Hatch, O.M., Hedden, T., Hodge, C., Japardi, K.C., Kuhn, T.P., Ly, T.K.,  
482 Smith, S.M., Somerville, L.H., Uğurbil, K., van der Kouwe, A., Van Essen, D., Woods,  
483 R.P., Yacoub, E., 2019. The Lifespan Human Connectome Project in Aging: An overview.  
484 *Neuroimage* 185, 335–348. <https://doi.org/10.1016/j.neuroimage.2018.10.009>

- 485 Boudreau, P., Yeh, W.H., Dumont, G.A., Boivin, D.B., 2013. Circadian variation of heart rate  
486 variability across sleep stages. *Sleep*. <https://doi.org/10.5665/sleep.3230>
- 487 Brown, A.M.C., Gervais, N.J., 2020. Role of Ovarian Hormones in the Modulation of Sleep in  
488 Females Across the Adult Lifespan. *Endocrinology* 161.  
489 <https://doi.org/10.1210/endocr/bqaa128>
- 490 Chang, C., Cunningham, J.P., Glover, G.H., 2009. Influence of heart rate on the BOLD signal:  
491 The cardiac response function. *Neuroimage*.  
492 <https://doi.org/10.1016/j.neuroimage.2008.09.029>
- 493 Chen, R.L., Kassem, N.A., Redzic, Z.B., Chen, C.P.C., Segal, M.B., Preston, J.E., 2009. Age-  
494 related changes in choroid plexus and blood–cerebrospinal fluid barrier function in the  
495 sheep. *Exp. Gerontol.* 44, 289–296.  
496 <https://doi.org/https://doi.org/10.1016/j.exger.2008.12.004>
- 497 Cox, R.W., 1996. AFNI: Software for analysis and visualization of functional magnetic  
498 resonance neuroimages. *Comput. Biomed. Res.* <https://doi.org/10.1006/cbmr.1996.0014>
- 499 Da Mesquita, S., Louveau, A., Vaccari, A., Smirnov, I., Cornelison, R.C., Kingsmore, K.M.,  
500 Contarino, C., Onengut-Gumuscu, S., Farber, E., Raper, D., Viar, K.E., Powell, R.D.,  
501 Baker, W., Dabhi, N., Bai, R., Cao, R., Hu, S., Rich, S.S., Munson, J.M., Lopes, M.B.,  
502 Overall, C.C., Acton, S.T., Kipnis, J., 2018. Functional aspects of meningeal lymphatics in  
503 ageing and Alzheimer’s disease. *Nature* 560, 185–191. [https://doi.org/10.1038/s41586-018-](https://doi.org/10.1038/s41586-018-0368-8)  
504 [0368-8](https://doi.org/10.1038/s41586-018-0368-8)
- 505 De Gennaro, L., Gorgoni, M., Reda, F., Lauri, G., Truglia, I., Cordone, S., Scarpelli, S.,  
506 Mangiaruga, A., D’atri, A., Lacidogna, G., Ferrara, M., Marra, C., Rossini, P.M., 2017. The  
507 Fall of Sleep K-Complex in Alzheimer Disease. *Sci. Rep.* 7, 39688.

- 508 <https://doi.org/10.1038/srep39688>
- 509 Douglas, N.J., White, D.P., Pickett, C.K., Weil, J. V., Zwillich, C.W., 1982. Respiration during  
510 sleep in normal man. *Thorax*. <https://doi.org/10.1136/thx.37.11.840>
- 511 Eide, P.K., Vatnehol, S.A.S., Emblem, K.E., Ringstad, G., 2018. Magnetic resonance imaging  
512 provides evidence of glymphatic drainage from human brain to cervical lymph nodes. *Sci.*  
513 *Rep.* 8, 7194. <https://doi.org/10.1038/s41598-018-25666-4>
- 514 Fleischman, D., Berdahl, J.P., Zaydlarova, J., Stinnett, S., Fautsch, M.P., Allingham, R.R., 2012.  
515 Cerebrospinal Fluid Pressure Decreases with Older Age. *PLoS One* 7, 1–9.  
516 <https://doi.org/10.1371/journal.pone.0052664>
- 517 Fukunaga, M., Horovitz, S.G., van Gelderen, P., de Zwart, J.A., Jansma, J.M., Ikonomidou,  
518 V.N., Chu, R., Deckers, R.H.R., Leopold, D.A., Duyn, J.H., 2006. Large-amplitude,  
519 spatially correlated fluctuations in BOLD fMRI signals during extended rest and early sleep  
520 stages. *Magn. Reson. Imaging* 24, 979–992. <https://doi.org/10.1016/j.mri.2006.04.018>
- 521 Fultz, N.E., Bonmassar, G., Setsompop, K., Stickgold, R.A., Rosen, B.R., Polimeni, J.R., Lewis,  
522 L.D., 2019. Coupled electrophysiological, hemodynamic, and cerebrospinal fluid  
523 oscillations in human sleep. *Science* (80-. ). <https://doi.org/10.1126/science.aax5440>
- 524 Gao, J.H., Liu, H.L., 2012. Inflow effects on functional MRI. *Neuroimage*.  
525 <https://doi.org/10.1016/j.neuroimage.2011.09.088>
- 526 Gao, J.H., Miller, I., Lai, S., Xiong, J., Fox, P.T., 1996. Quantitative assessment of blood inflow  
527 effects in functional MRI signals. *Magn. Reson. Med.*  
528 <https://doi.org/10.1002/mrm.1910360219>
- 529 Gu, Y., Han, F., Sainburg, L.E., Liu, X., 2020. Transient Arousal Modulations Contribute to  
530 Resting-State Functional Connectivity Changes Associated with Head Motion Parameters.

- 531 Cereb. Cortex. <https://doi.org/10.1093/cercor/bhaa096>
- 532 Gu, Y., Han, F., Sainburg, L.E., Schade, M.M., Buxton, O.M., Duyn, J.H., Liu, X., 2022. An  
533 orderly sequence of autonomic and neural events at transient arousal changes. *Neuroimage*.  
534 <https://doi.org/10.1016/j.neuroimage.2022.119720>
- 535 Gu, Y., Sainburg, L.E., Kuang, S., Han, F., Williams, J.W., Liu, Y., Zhang, N., Zhang, X.,  
536 Leopold, D.A., Liu, X., 2021. Brain Activity Fluctuations Propagate as Waves Traversing  
537 the Cortical Hierarchy. *Cereb. Cortex* 31, 3986–4005.  
538 <https://doi.org/10.1093/cercor/bhab064>
- 539 Guazzi, M., Zanchetti, A., 1965. Carotid sinus and aortic reflexes in the regulation of circulation  
540 during sleep. *Science* (80-. ). <https://doi.org/10.1126/science.148.3668.397>
- 541 Hablitz, L.M., Vinitsky, H.S., Sun, Q., Stæger, F.F., Sigurdsson, B., Mortensen, K.N., Lilius,  
542 T.O., Nedergaard, M., 2019. Increased glymphatic influx is correlated with high EEG delta  
543 power and low heart rate in mice under anesthesia. *Sci. Adv.* 5, eaav5447.  
544 <https://doi.org/10.1126/sciadv.aav5447>
- 545 Hachul, H., Frange, C., Bezerra, A.G., Hirotsu, C., Pires, G.N., Andersen, M.L., Bittencourt, L.,  
546 Tufik, S., 2015. The effect of menopause on objective sleep parameters: Data from an  
547 epidemiologic study in São Paulo, Brazil. *Maturitas* 80, 170–178.  
548 <https://doi.org/https://doi.org/10.1016/j.maturitas.2014.11.002>
- 549 Han, F., Brown, G.L., Zhu, Y., Belkin-Rosen, A.E., Lewis, M.M., Du, G., Gu, Y., Eslinger, P.J.,  
550 Mailman, R.B., Huang, X., Liu, X., 2021a. Decoupling of Global Brain Activity and  
551 Cerebrospinal Fluid Flow in Parkinson’s Disease Cognitive Decline. *Mov. Disord.* 36,  
552 2066–2076. <https://doi.org/10.1002/mds.28643>
- 553 Han, F., Chen, J., Belkin-Rosen, A., Gu, Y., Luo, L., Buxton, O.M., Liu, X., 2021b. Reduced

554 coupling between cerebrospinal fluid flow and global brain activity is linked to Alzheimer  
555 disease-related pathology. *PLoS Biol.* 19, 1–25.  
556 <https://doi.org/10.1371/journal.pbio.3001233>

557 Han, F., Liu, Xufu, Mailman, R.B., Huang, X., Liu, Xiao, 2022. Early  $\beta$ -amyloid accumulation  
558 and hypoconnectivity in the default mode network are related to its disengagement from  
559 global brain activity. *bioRxiv*. <https://doi.org/10.1101/2022.07.24.501309>

560 Harms, M.P., Somerville, L.H., Ances, B.M., Andersson, J., Barch, D.M., Bastiani, M.,  
561 Bookheimer, S.Y., Brown, T.B., Buckner, R.L., Burgess, G.C., Coalson, T.S., Chappell,  
562 M.A., Dapretto, M., Douaud, G., Fischl, B., Glasser, M.F., Greve, D.N., Hodge, C.,  
563 Jamison, K.W., Jbabdi, S., Kandala, S., Li, X., Mair, R.W., Mangia, S., Marcus, D.,  
564 Mascali, D., Moeller, S., Nichols, T.E., Robinson, E.C., Salat, D.H., Smith, S.M.,  
565 Sotiropoulos, S.N., Terpstra, M., Thomas, K.M., Tisdall, M.D., Ugurbil, K., van der  
566 Kouwe, A., Woods, R.P., Zöllei, L., Van Essen, D.C., Yacoub, E., 2018. Extending the  
567 Human Connectome Project across ages: Imaging protocols for the Lifespan Development  
568 and Aging projects. *Neuroimage* 183, 972–984.  
569 <https://doi.org/10.1016/j.neuroimage.2018.09.060>

570 Helakari, H., Korhonen, V., Holst, S.C., Piispala, J., Kallio, M., Väyrynen, T., Huotari, N.,  
571 Raitamaa, L., Tuunanen, J., Kananen, J., Järvelä, M., Tuovinen, T., Raatikainen, V.,  
572 Borchardt, V., Kinnunen, H., Nedergaard, M., Kiviniemi, V., 2022. Human NREM Sleep  
573 Promotes Brain-Wide Vasomotor and Respiratory Pulsations. *J. Neurosci.* JN-RM-0934-21.  
574 <https://doi.org/10.1523/jneurosci.0934-21.2022>

575 Hladky, S.B., Barrand, M.A., 2022. The glymphatic hypothesis: the theory and the evidence,  
576 Fluids and Barriers of the CNS. *BioMed Central*. <https://doi.org/10.1186/s12987-021->

577 00282-z

578 Holth, J.K., Fritschi, S.K., Wang, C., Pedersen, N.P., Cirrito, J.R., Mahan, T.E., Finn, M.B.,  
579 Manis, M., Geerling, J.C., Fuller, P.M., Lucey, B.P., Holtzman, D.M., 2019. The sleep-  
580 wake cycle regulates brain interstitial fluid tau in mice and CSF tau in humans. *Science*  
581 (80- ). <https://doi.org/10.1126/science.aav2546>

582 Hou, Y., Dan, X., Babbar, M., Wei, Y., Hasselbalch, S.G., Croteau, D.L., Bohr, V.A., 2019.  
583 Ageing as a risk factor for neurodegenerative disease. *Nat. Rev. Neurol.* 15, 565–581.  
584 <https://doi.org/10.1038/s41582-019-0244-7>

585 Iliff, J.J., Chen, M.J., Plog, B.A., Zeppenfeld, D.M., Soltero, M., Yang, L., Singh, I., Deane, R.,  
586 Nedergaard, M., 2014. Impairment of glymphatic pathway function promotes tau pathology  
587 after traumatic brain injury. *J. Neurosci.* <https://doi.org/10.1523/JNEUROSCI.3020-14.2014>

588 Iliff, J.J., Wang, M., Liao, Y., Plogg, B.A., Peng, W., Gundersen, G.A., Benveniste, H., Vates,  
589 G.E., Deane, R., Goldman, S.A., Nagelhus, E.A., Nedergaard, M., 2012. A paravascular  
590 pathway facilitates CSF flow through the brain parenchyma and the clearance of interstitial  
591 solutes, including amyloid  $\beta$ . *Sci. Transl. Med.*  
592 <https://doi.org/10.1126/scitranslmed.3003748>

593 Iliff, J.J., Wang, M., Zeppenfeld, D.M., Venkataraman, A., Plog, B.A., Liao, Y., Deane, R.,  
594 Nedergaard, M., 2013. Cerebral arterial pulsation drives paravascular CSF-Interstitial fluid  
595 exchange in the murine brain. *J. Neurosci.* [https://doi.org/10.1523/JNEUROSCI.1592-](https://doi.org/10.1523/JNEUROSCI.1592-13.2013)  
596 13.2013

597 Jack, C.R., Knopman, D.S., Jagust, W.J., Petersen, R.C., Weiner, M.W., Aisen, P.S., Shaw,  
598 L.M., Vemuri, P., Wiste, H.J., Weigand, S.D., Lesnick, T.G., Pankratz, V.S., Donohue,  
599 M.C., Trojanowski, J.Q., 2013. Tracking pathophysiological processes in Alzheimer's

600 disease: An updated hypothetical model of dynamic biomarkers. *Lancet Neurol.* 12, 207–  
601 216. [https://doi.org/10.1016/S1474-4422\(12\)70291-0](https://doi.org/10.1016/S1474-4422(12)70291-0)

602 Jessen, N.A., Munk, A.S.F., Lundgaard, I., Nedergaard, M., 2015. The Glymphatic System: A  
603 Beginner’s Guide. *Neurochem. Res.* <https://doi.org/10.1007/s11064-015-1581-6>

604 Ju, Y.-E.S., Ooms, S.J., Sutphen, C., Macauley, S.L., Zangrilli, M.A., Jerome, G., Fagan, A.M.,  
605 Mignot, E., Zempel, J.M., Claassen, J.A.H.R., Holtzman, D.M., 2017. Slow wave sleep  
606 disruption increases cerebrospinal fluid amyloid- $\beta$  levels. *Brain* 140, 2104–2111.  
607 <https://doi.org/10.1093/brain/awx148>

608 Kiviniemi, V., Wang, X., Korhonen, V., Keinänen, T., Tuovinen, T., Autio, J., Levan, P.,  
609 Keilholz, S., Zang, Y.F., Hennig, J., Nedergaard, M., 2016. Ultra-fast magnetic resonance  
610 encephalography of physiological brain activity-Glymphatic pulsation mechanisms? *J.*  
611 *Cereb. Blood Flow Metab.* <https://doi.org/10.1177/0271678X15622047>

612 Kress, B.T., Iliff, J.J., Xia, M., Wang, M., Wei Bs, H.S., Zeppenfeld, D., Xie, L., Hongyi Kang,  
613 B.S., Xu, Q., Liew, J.A., Plog, B.A., Ding, F., PhD, R.D., Nedergaard, M., 2014.  
614 Impairment of paravascular clearance pathways in the aging brain. *Ann. Neurol.* 76, 845–  
615 861. <https://doi.org/10.1002/ana.24271>

616 Larson-Prior, L.J., Zempel, J.M., Nolan, T.S., Prior, F.W., Snyder, A., Raichle, M.E., 2009.  
617 Cortical network functional connectivity in the descent to sleep. *Proc. Natl. Acad. Sci. U. S.*  
618 *A.* <https://doi.org/10.1073/pnas.0900924106>

619 Levine, D.A., Gross, A.L., Briceño, E.M., Tilton, N., Giordani, B.J., Sussman, J.B., Hayward,  
620 R.A., Burke, J.F., Hingtgen, S., Elkind, M.S.V., Manly, J.J., Gottesman, R.F., Gaskin, D.J.,  
621 Sidney, S., Sacco, R.L., Tom, S.E., Wright, C.B., Yaffe, K., Galecki, A.T., 2021. Sex  
622 Differences in Cognitive Decline among US Adults. *JAMA Netw. Open* 4, 1–13.

- 623 <https://doi.org/10.1001/jamanetworkopen.2021.0169>
- 624 Liu, X., De Zwart, J.A., Schölvinc, M.L., Chang, C., Ye, F.Q., Leopold, D.A., Duyn, J.H.,  
625 2018. Subcortical evidence for a contribution of arousal to fMRI studies of brain activity.  
626 Nat. Commun. <https://doi.org/10.1038/s41467-017-02815-3>
- 627 Liu, X., Leopold, D.A., Yang, Y., 2021. Single-neuron firing cascades underlie global  
628 spontaneous brain events. Proc. Natl. Acad. Sci. U. S. A. 118, 1–10.  
629 <https://doi.org/10.1073/pnas.2105395118>
- 630 Liu, X., Yanagawa, T., Leopold, D.A., Chang, C., Ishida, H., Fujii, N., Duyn, J.H., 2015.  
631 Arousal transitions in sleep, wakefulness, and anesthesia are characterized by an orderly  
632 sequence of cortical events. Neuroimage. <https://doi.org/10.1016/j.neuroimage.2015.04.003>
- 633 Mander, B.A., Marks, S.M., Vogel, J.W., Rao, V., Lu, B., Saletin, J.M., Ancoli-Israel, S., Jagust,  
634 W.J., Walker, M.P., 2015.  $\beta$ -amyloid disrupts human NREM slow waves and related  
635 hippocampus-dependent memory consolidation. Nat. Neurosci. 18, 1051–1057.  
636 <https://doi.org/10.1038/nn.4035>
- 637 Mander, B.A., Winer, J.R., Walker, M.P., 2017. Sleep and Human Aging. Neuron 94, 19–36.  
638 <https://doi.org/https://doi.org/10.1016/j.neuron.2017.02.004>
- 639 Mawuenyega, K.G., Sigurdson, W., Ovod, V., Munsell, L., Kasten, T., Morris, J.C., Yarasheski,  
640 K.E., Bateman, R.J., 2010. Decreased clearance of CNS  $\beta$ -amyloid in Alzheimer’s disease.  
641 Science (80-. ). 330, 1774. <https://doi.org/10.1126/science.1197623>
- 642 Mestre, H., Tithof, J., Du, T., Song, W., Peng, W., Sweeney, A.M., Olveda, G., Thomas, J.H.,  
643 Nedergaard, M., Kelley, D.H., 2018. Flow of cerebrospinal fluid is driven by arterial  
644 pulsations and is reduced in hypertension. Nat. Commun. [https://doi.org/10.1038/s41467-](https://doi.org/10.1038/s41467-018-07318-3)  
645 [018-07318-3](https://doi.org/10.1038/s41467-018-07318-3)



- 646 Mielke, M.M., Vemuri, P., Rocca, W.A., 2014. Clinical epidemiology of Alzheimer's disease:  
647 Assessing sex and gender differences. *Clin. Epidemiol.*  
648 <https://doi.org/10.2147/CLEP.S37929>
- 649 Nedergaard, M., Goldman, S.A., 2020. Glymphatic failure as a final common pathway to  
650 dementia. *Science (80-. )*. 370, 50–56. <https://doi.org/10.1126/science.abb8739>
- 651 Nooyens, A.C.J., Wijnhoven, H.A.H., Schaap, L.S., Sialino, L.D., Kok, A.A.L., Visser, M.,  
652 Verschuren, W.M.M., Picavet, H.S.J., van Oostrom, S.H., 2022. Sex Differences in  
653 Cognitive Functioning with Aging in the Netherlands. *Gerontology*.  
654 <https://doi.org/10.1159/000520318>
- 655 Olbrich, S., Mulert, C., Karch, S., Trenner, M., Leicht, G., Pogarell, O., Hegerl, U., 2009. EEG-  
656 vigilance and BOLD effect during simultaneous EEG/fMRI measurement. *Neuroimage*.  
657 <https://doi.org/10.1016/j.neuroimage.2008.11.014>
- 658 Özbay, P.S., Chang, C., Picchioni, D., Mandelkow, H., Chappel-Farley, M.G., van Gelderen, P.,  
659 de Zwart, J.A., Duyn, J., 2019. Sympathetic activity contributes to the fMRI signal.  
660 *Commun. Biol.* <https://doi.org/10.1038/s42003-019-0659-0>
- 661 Özbay, P.S., Chang, C., Picchioni, D., Mandelkow, H., Moehlman, T.M., Chappel-Farley, M.G.,  
662 van Gelderen, P., de Zwart, J.A., Duyn, J.H., 2018. Contribution of systemic vascular  
663 effects to fMRI activity in white matter. *Neuroimage*.  
664 <https://doi.org/10.1016/j.neuroimage.2018.04.045>
- 665 Pais-Roldán, P., Takahashi, K., Sobczak, F., Chen, Y., Zhao, X., Zeng, H., Jiang, Y., Yu, X.,  
666 2020. Indexing brain state-dependent pupil dynamics with simultaneous fMRI and optical  
667 fiber calcium recording. *Proc. Natl. Acad. Sci. U. S. A.* 117, 6875–6882.  
668 <https://doi.org/10.1073/pnas.1909937117>

- 669 Palmqvist, S., Schöll, M., Strandberg, O., Mattsson, N., Stomrud, E., Zetterberg, H., Blennow,  
670 K., Landau, S., Jagust, W., Hansson, O., 2017. Earliest accumulation of  $\beta$ -amyloid occurs  
671 within the default-mode network and concurrently affects brain connectivity. *Nat. Commun.*  
672 <https://doi.org/10.1038/s41467-017-01150-x>
- 673 Peng, W., Achariyar, T.M., Li, B., Liao, Y., Mestre, H., Hitomi, E., Regan, S., Kasper, T., Peng,  
674 S., Ding, F., Benveniste, H., Nedergaard, M., Deane, R., 2016. Suppression of glymphatic  
675 fluid transport in a mouse model of Alzheimer's disease. *Neurobiol. Dis.* 93, 215–225.  
676 <https://doi.org/https://doi.org/10.1016/j.nbd.2016.05.015>
- 677 Power, J.D., Barnes, K.A., Snyder, A.Z., Schlaggar, B.L., Petersen, S.E., 2012. Spurious but  
678 systematic correlations in functional connectivity MRI networks arise from subject motion.  
679 *Neuroimage.* <https://doi.org/10.1016/j.neuroimage.2011.10.018>
- 680 Power, J.D., Mitra, A., Laumann, T.O., Snyder, A.Z., Schlaggar, B.L., Petersen, S.E., 2014.  
681 Methods to detect, characterize, and remove motion artifact in resting state fMRI.  
682 *Neuroimage* 84, 320–341. <https://doi.org/10.1016/j.neuroimage.2013.08.048>
- 683 Power, J.D., Plitt, M., Gotts, S.J., Kundu, P., Voon, V., Bandettini, P.A., Martin, A., 2018.  
684 Ridding fMRI data of motion-related influences: Removal of signals with distinct spatial  
685 and physical bases in multiecho data. *Proc. Natl. Acad. Sci. U. S. A.*  
686 <https://doi.org/10.1073/pnas.1720985115>
- 687 Qiu, C., Kivipelto, M., von Strauss, E., 2009. Epidemiology of Alzheimer's disease: occurrence,  
688 determinants, and strategies toward intervention. *Dialogues Clin. Neurosci.* 11, 111–128.  
689 <https://doi.org/10.31887/DCNS.2009.11.2/cqiu>
- 690 Raut, R. V., Snyder, A.Z., Mitra, A., Yellin, D., Fujii, N., Malach, R., Raichle, M.E., 2021.  
691 Global waves synchronize the brain's functional systems with fluctuating arousal. *Sci. Adv.*

692 7, 1–16. <https://doi.org/10.1126/sciadv.abf2709>

693 Redline, S., Kirchner, H.L., Quan, S.F., Gottlieb, D.J., Kapur, V., Newman, A., 2004. The  
694 Effects of Age, Sex, Ethnicity, and Sleep-Disordered Breathing on Sleep Architecture.  
695 *Arch. Intern. Med.* 164, 406–418. <https://doi.org/10.1001/archinte.164.4.406>

696 Smith, S.M., Jenkinson, M., Woolrich, M.W., Beckmann, C.F., Behrens, T.E.J., Johansen-Berg,  
697 H., Bannister, P.R., De Luca, M., Drobnjak, I., Flitney, D.E., Niazy, R.K., Saunders, J.,  
698 Vickers, J., Zhang, Y., De Stefano, N., Brady, J.M., Matthews, P.M., 2004. Advances in  
699 functional and structural MR image analysis and implementation as FSL. *Neuroimage* 23,  
700 S208–S219. <https://doi.org/https://doi.org/10.1016/j.neuroimage.2004.07.051>

701 Snyder, F., Hobson, J.A., Morrison, D.F., Goldfrank, F., 1964. Changes in respiration, heart rate,  
702 and systolic blood pressure in human sleep. *J. Appl. Physiol.*  
703 <https://doi.org/10.1152/jappl.1964.19.3.417>

704 Sperling, R., Mormino, E., Johnson, K., 2014. The evolution of preclinical Alzheimer’s disease:  
705 Implications for prevention trials. *Neuron*. <https://doi.org/10.1016/j.neuron.2014.10.038>

706 Tarasoff-Conway, J.M., Carare, R.O., Osorio, R.S., Glodzik, L., Butler, T., Fieremans, E., Axel,  
707 L., Rusinek, H., Nicholson, C., Zlokovic, B. V., Frangione, B., Blennow, K., Ménard, J.,  
708 Zetterberg, H., Wisniewski, T., De Leon, M.J., 2015. Clearance systems in the brain -  
709 Implications for Alzheimer disease. *Nat. Rev. Neurol.*  
710 <https://doi.org/10.1038/nrneurol.2015.119>

711 Thompson, G.J., Pan, W.-J., Magnuson, M.E., Jaeger, D., Keilholz, S.D., 2014. Quasi-periodic  
712 patterns (QPP): Large-scale dynamics in resting state fMRI that correlate with local  
713 infraslow electrical activity. *Neuroimage* 84, 1018–1031.  
714 <https://doi.org/https://doi.org/10.1016/j.neuroimage.2013.09.029>

- 715 Turchi, J., Chang, C., Ye, F.Q., Russ, B.E., Yu, D.K., Cortes, C.R., Monosov, I.E., Duyn, J.H.,  
716 Leopold, D.A., 2018. The Basal Forebrain Regulates Global Resting-State fMRI  
717 Fluctuations. *Neuron*. <https://doi.org/10.1016/j.neuron.2018.01.032>
- 718 Turner, K.L., Gheres, K.W., Drew, P.J., 2022. Relating Pupil Diameter and Blinking to Cortical  
719 Activity and Hemodynamics across Arousal States. *Journal of Neuroscience*.  
720 <https://doi.org/10.1523/JNEUROSCI.1244-22.2022>
- 721 Turner, K.L., Gheres, K.W., Proctor, E.A., Drew, P.J., 2020. Neurovascular coupling and  
722 bilateral connectivity during NREM and REM sleep. *Elife* 9, e62071.  
723 <https://doi.org/10.7554/eLife.62071>
- 724 van Veluw, S.J., Hou, S.S., Calvo-Rodriguez, M., Arbel-Ornath, M., Snyder, A.C., Frosch, M.P.,  
725 Greenberg, S.M., Bacsikai, B.J., 2020. Vasomotion as a Driving Force for Paravascular  
726 Clearance in the Awake Mouse Brain. *Neuron*.  
727 <https://doi.org/10.1016/j.neuron.2019.10.033>
- 728 Varga, A.W., Wohlleber, M.E., Giménez, S., Romero, S., Alonso, J.F., Ducca, E.L., Kam, K.,  
729 Lewis, C., Tanzi, E.B., Twardy, S., Kishi, A., Parekh, A., Fischer, E., Gumb, T., Alcolea,  
730 D., Fortea, J., Lleó, A., Blennow, K., Zetterberg, H., Mosconi, L., Glodzik, L., Pirraglia, E.,  
731 Burschtin, O.E., de Leon, M.J., Rapoport, D.M., Lu, S., Ayappa, I., Osorio, R.S., 2016.  
732 Reduced Slow-Wave Sleep Is Associated with High Cerebrospinal Fluid A $\beta$ 242 Levels in  
733 Cognitively Normal Elderly. *Sleep* 39, 2041–2048. <https://doi.org/10.5665/sleep.6240>
- 734 Wang, M., He, Y., Sejnowski, T.J., Yu, X., 2018. Brain-state dependent astrocytic Ca<sup>2+</sup> signals  
735 are coupled to both positive and negative BOLD-fMRI signals. *Proc. Natl. Acad. Sci. U. S.*  
736 *A.* 115, E1647–E1656. <https://doi.org/10.1073/pnas.1711692115>
- 737 Winer, J.R., Mander, B.A., Kumar, S., Reed, M., Baker, S.L., Jagust, W.J., Walker, M.P., 2020.

738 Sleep Disturbance Forecasts  $\beta$ -Amyloid Accumulation across Subsequent Years. *Curr. Biol.*  
739 30, 4291-4298.e3. <https://doi.org/10.1016/j.cub.2020.08.017>

740 Xie, L., Kang, H., Xu, Q., Chen, M.J., Liao, Y., Thiagarajan, M., O'Donnell, J., Christensen,  
741 D.J., Nicholson, C., Iliff, J.J., Takano, T., Deane, R., Nedergaard, M., 2013. Sleep drives  
742 metabolite clearance from the adult brain. *Science* (80-. ).  
743 <https://doi.org/10.1126/science.1241224>

744 Yamada, S., Miyazaki, M., Yamashita, Y., Ouyang, C., Yui, M., Nakahashi, M., Shimizu, S.,  
745 Aoki, I., Morohoshi, Y., McComb, J.G., 2013. Influence of respiration on cerebrospinal  
746 fluid movement using magnetic resonance spin labeling. *Fluids Barriers CNS*.  
747 <https://doi.org/10.1186/2045-8118-10-36>

748 Zhou, Y., Cai, J., Zhang, W., Gong, X., Yan, S., Zhang, K., Luo, Z., Sun, J., Jiang, Q., Lou, M.,  
749 2020. Impairment of the Glymphatic Pathway and Putative Meningeal Lymphatic Vessels  
750 in the Aging Human. *Ann. Neurol.* 87, 357–369.  
751 <https://doi.org/https://doi.org/10.1002/ana.25670>

752 Ziemann, S.J., Melenovsky, V., Kass, D.A., 2005. Mechanisms, Pathophysiology, and Therapy of  
753 Arterial Stiffness. *Arterioscler. Thromb. Vasc. Biol.* 25, 932–943.  
754 <https://doi.org/10.1161/01.ATV.0000160548.78317.29>

755 Zou, W., Pu, T., Feng, W., Lu, M., Zheng, Y., Du, R., Xiao, M., Hu, G., 2019. Blocking  
756 meningeal lymphatic drainage aggravates Parkinson's disease-like pathology in mice  
757 overexpressing mutated  $\alpha$ -synuclein. *Transl. Neurodegener.* 8, 7.  
758 <https://doi.org/10.1186/s40035-019-0147-y>  
759  
760

761

762

763

764

### **Supplementary Materials**

765

**Fig. S1 to S4** for multiple supplementary figures

766

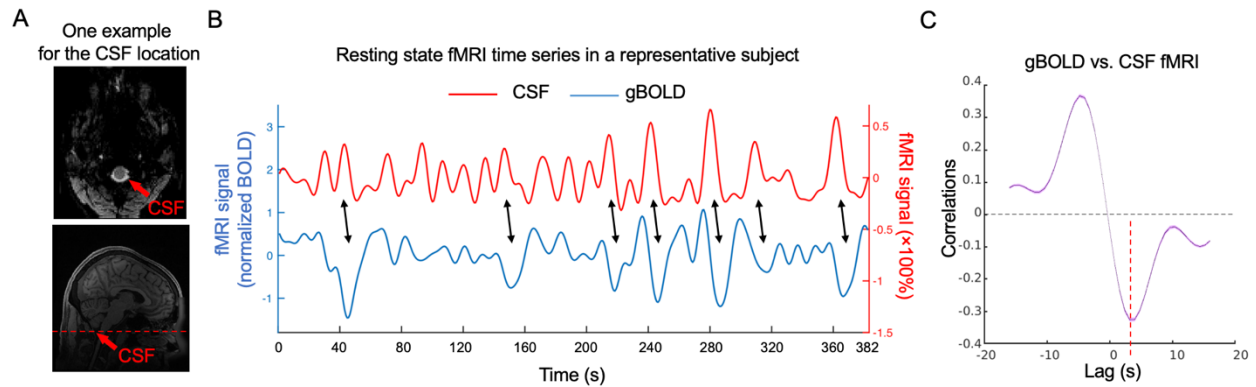

767

768

769 **Fig. S1 gBOLD is coupled with CSF changes in HCP-Aging data. (A) Top:** CSF region at  
770 bottom fMRI slice shown in an example subject; **Bottom:** location of bottom rsfMRI slice marked  
771 in corresponding structural MRI (dashed line). **(B)** gBOLD (blue) and CSF (red) rsfMRI signals  
772 showed a coupled change (black arrows) from a representative example. **(C)** Averaged cross-  
773 correlation function between gBOLD and CSF across 719 subjects. The red dashed line marks the  
774 time lag (+3.2-sec) where the negative peak of the mean cross-correlation occurs. The shaded  
775 regions represent the area within one standard error of the mean.

776

777

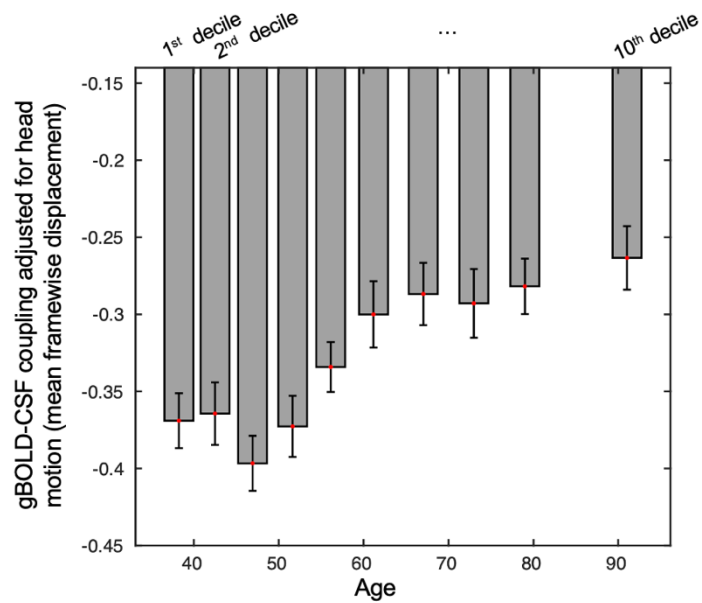

778

779 **Fig. S2 The age-coupling association was not affected by head motion during fMRI**  
780 **acquisition.** Similar results as **Fig.1** were found when the mean FD was regressed out from the  
781 gBOLD-CSF coupling for each rsfMRI session.

782



783

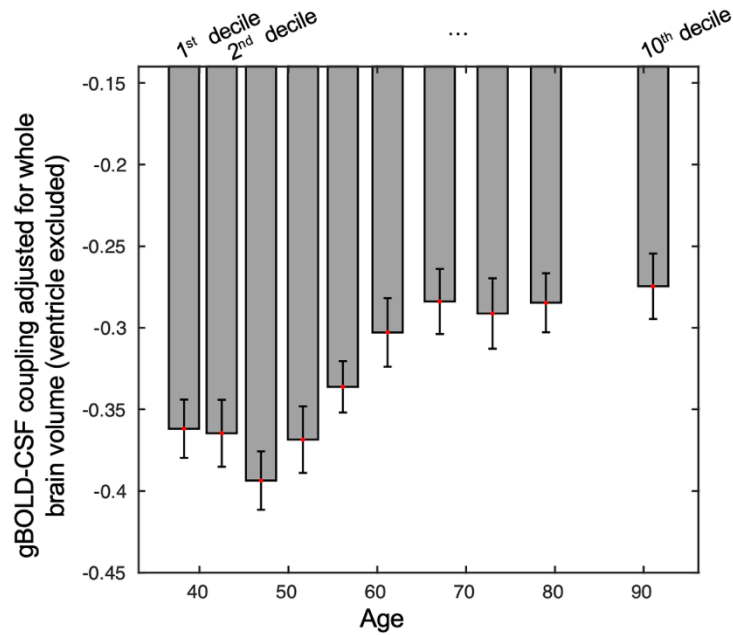

784

785 **Fig. S3 The age-coupling association was not dominant by the whole brain volume.** Consistent  
786 results as **Fig.1** were found when we regressed out the whole brain volume (ventricles excluded)  
787 from the gBOLD-CSF coupling for each rsfMRI session.

788

789

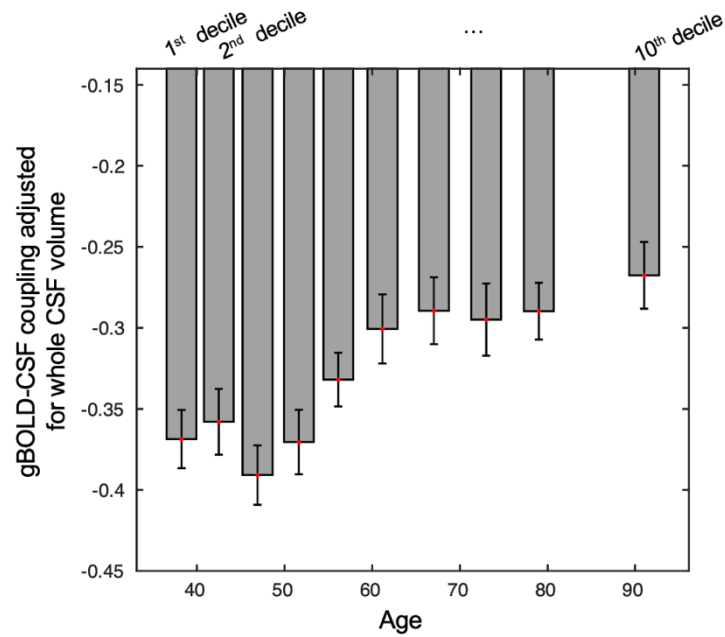

790

791 **Fig. S4 The age-coupling association was not affected by the whole CSF volume.** Similar  
792 results as **Fig.1** were found when the volume of the whole CSF area was regressed out from the  
793 gBOLD-CSF coupling for each rsfMRI session.
